# Supplementary material for: Immune checkpoint inhibition-related colitis: symptoms, endoscopic features, histology and response to management
Source: PubMed Central journal article supplement — ESMO Open. 2018 Jan 13;3(1):e000278. doi: 10.1136/esmoopen-2017-000278 (PMC5786923; doi:10.1136/esmoopen-2017-000278), 2018-01-13
Supplement: esmoopen-2017-000278supp001.pdf [file esmoopen-2017-000278supp001.pdf]

**Supplementary Figure 1.** Representative HE sections demonstrating immune-checkpoint inhibition-related colitis

Representative HE sections demonstrating immune-checkpoint inhibition-related colitis characterized by increased lamina propria cellularity (2a, 2b and 2d). 2a, extension of the infiltrate into the submucosa. 2b, neutrophilic inflammation with a crypt abscesses, mild cryptitis, mucin depletion of epithelial cells and small foci with minimal increase in intraepithelial lymphocytes. 2c, apoptotic cells in crypt epithelium. 2d, prominent intraepithelial lymphocytosis.

**Supplementary Table 1.** Van der Heide score for the assessment of endoscopic activity of colitis

| Endoscopic feature   | Grade  |                  |                    |
|----------------------|--------|------------------|--------------------|
|                      | 0      | 1                | 2                  |
| Color                | Normal | Red              | Deeply red         |
| Vascular patten      | Normal | Partially absent | Completely absent  |
| Friability           | Normal | Slightly friable | Severely friable   |
| Granularity          | Absent | Fine granularity | Coarse granularity |
| Rectal valves        | Sharp  | Swollen          | Absent             |
| Ulcers               | Absent | Few              | Multiple           |
| Spontaneous bleeding | Absent | Discrete         | Severe             |
| Mucopurulent exudate | Absent | Little           | Much               |

A score of 0 – 6 is considered as low, while a score of 7 – 16 is considered as high

Endoscopic Mayo score for the assessment of endoscopic activity of colitis

| Grade | Findings                                                                 |
|-------|--------------------------------------------------------------------------|
| 0     | Normal mucosa                                                            |
| 1     | Mild: Erythema, decreased vascular pattern, mild friability              |
| 2     | Moderate: marked erythema, absent vascular pattern, friability, erosions |
| 3     | Severe: spontaneous bleeding, ulcers                                     |

**Supplementary Table 2.** Description of patients that underwent surgery due to bowel perforation as a complication of immune-related colitis

| Patient | Tumor type         | Treatment                 | Grade of diarrhea at presentation | Days between diarrhea and start immunosuppression | Immunosuppression    | Days between diarrhea and endoscopy | Ulcers | Pancolitis | Mayo score | Addition of infliximab | Days between endoscopy and start infliximab | Days between endoscopy and surgery | Surgery                                 |
|---------|--------------------|---------------------------|-----------------------------------|---------------------------------------------------|----------------------|-------------------------------------|--------|------------|------------|------------------------|---------------------------------------------|------------------------------------|-----------------------------------------|
| 1       | Uveal melanoma     | Ipilimumab 10 mg/kg + RFA | 2                                 | 13                                                | Prednisone 1 mg/kg   | 14                                  | yes    | yes        | 2          | yes                    | 3                                           | 10                                 | Left sided hemicolectomy with colostomy |
| 2       | Cutaneous melanoma | Ipilimumab 3 mg/kg        | 2                                 | 2                                                 | Prednisone < 1 mg/kg | 9                                   | yes    | yes        | NA         | yes                    | 0                                           | 8                                  | Subtotal colectomy with ileostomy       |
| 3       | Cutaneous melanoma | Ipilimumab 3 mg/kg        | 3                                 | 14                                                | Prednisone < 1 mg/kg | 14                                  | yes    | yes        | 2          | yes                    | 12                                          | 9                                  | Sigmoid resection with colostomy        |

Abbreviations: NA; Not Available, RFA; radio-frequency ablation

**Supplementary Table 3.** Histopathological features and association with symptoms, endoscopic features and treatment management from 90 biopsies

| <b>Histopathological features</b>                           | <b>Total No. (%)</b> | <b>Grade of diarrhea<sup>†</sup><br/>G2/G3 No. (%)</b> | <b>P value</b> | <b>Bloody stools no/yes No. (%)</b> | <b>P value</b> | <b>Endoscopic Mayo score<br/>0-1/2-3 No. (%)</b> | <b>P value</b> | <b>Need for infliximab no/yes No. (%)</b> | <b>P value</b> |
|-------------------------------------------------------------|----------------------|--------------------------------------------------------|----------------|-------------------------------------|----------------|--------------------------------------------------|----------------|-------------------------------------------|----------------|
| Lamina propria cellularity                                  |                      |                                                        |                |                                     |                |                                                  |                |                                           |                |
| Normal                                                      | 15 (16)              | 6 (50)/6 (50)                                          | 0.16           | 14 (93)/1 (7)                       | 0.01           | 15 (100)/0 (0)                                   | < 0.01         | 11 (73)/4 (27)                            | 0.02           |
| Increased                                                   |                      |                                                        |                |                                     |                |                                                  |                |                                           |                |
| Focal                                                       | 7 (8)                | 3 (75)/1 (25)                                          |                | 6 (86)/1 (14)                       |                | 7 (100)/0 (0)                                    |                | 5 (71)/2 (29)                             |                |
| Patchy                                                      | 24 (27)              | 8 (40)/12 (60)                                         |                | 19 (79)/5 (21)                      |                | 14 (70)/6 (30)                                   |                | 8 (33)/16 (67)                            |                |
| Diffuse, superficial                                        | 4 (4)                | 0 (0)/4 (100)                                          |                | 3 (75)/1 (25)                       |                | 3 (75)/1 (25)                                    |                | 3 (75)/1 (25)                             |                |
| Diffuse, transmucosal - mild                                | 24 (27)              | 13 (59)/9 (41)                                         |                | 12 (50)/12 (50)                     |                | 12 (50)/12 (50)                                  |                | 6 (25)/18 (75)                            |                |
| Diffuse, transmucosal - moderate                            | 16 (18)              | 4 (31)/9 (69)                                          |                | 7 (44)/9 (56)                       |                | 7 (44)/9 (56)                                    |                | 7 (44)/9 (56)                             |                |
| Diffuse, transmucosal – severe                              | 0 (0)                | 0 (0)                                                  |                | 0 (0)                               |                | 0 (0)                                            |                | 0 (0)                                     |                |
| Crypt architecture                                          |                      |                                                        |                |                                     |                |                                                  |                |                                           |                |
| Normal                                                      | 58 (64)              | 21 (44)/27 (56)                                        | 0.73           | 48 (83)/10 (17)                     | < 0.001        | 46 (82)/10 (18)                                  | < 0.001        | 30 (52)/28 (48)                           | 0.26           |
| Irregular – mild                                            | 23 (26)              | 9 (47)/10 (53)                                         |                | 12 (52)/11 (48)                     |                | 10 (48)/11 (52)                                  |                | 7 (30)/16 (70)                            |                |
| Irregular – moderate                                        | 8 (9)                | 4 (57)/3 (43)                                          |                | 1 (13)/7 (87)                       |                | 2 (25)/6 (75)                                    |                | 3 (38)/5 (62)                             |                |
| Irregular – severe                                          | 1 (1)                | 0 (0)/1 (100)                                          |                | 0 (0)/1 (100)                       |                | 0 (0)/1 (100)                                    |                | 0 (0)/1 (100)                             |                |
| Mucosal surface                                             |                      |                                                        |                |                                     |                |                                                  |                |                                           |                |
| Flat/normal                                                 | 74 (82)              | 29 (47)/33 (53)                                        | 0.38           | 56 (76)/18 (24)                     | < 0.001        | 54 (76)/17 (24)                                  | < 0.001        | 34 (46)/40 (54)                           | 0.61           |
| Irregular                                                   | 15 (17)              | 4 (33)/8 (67)                                          |                | 5 (33)/10 (67)                      |                | 4 (29)/10 (71)                                   |                | 6 (40)/9 (60)                             |                |
| Villous                                                     | 1 (1)                | 1 (100)/0 (0)                                          |                | 0 (0)/1 (100)                       |                | 0 (0)/1 (100)                                    |                | 0 (0)/1 (100)                             |                |
| Apoptotic cells in crypt epithelium                         |                      |                                                        |                |                                     |                |                                                  |                |                                           |                |
| Absent/hardly any                                           | 52 (58)              | 17 (41)/25 (59)                                        | 0.75           | 39 (75)/13 (25)                     | 0.27           | 37 (76)/12 (24)                                  | 0.30           | 30 (58)/22 (42)                           | 0.03           |
| Mild                                                        | 28 (31)              | 13 (50)/13 (50)                                        |                | 15 (54)/13 (46)                     |                | 16 (59)/11 (41)                                  |                | 7 (25)/21 (75)                            |                |
| Moderate                                                    | 6 (7)                | 2 (50)/2 (50)                                          |                | 4 (67)/2 (33)                       |                | 3 (50)/3 (50)                                    |                | 2 (33)/4 (67)                             |                |
| Severe                                                      | 4 (4)                | 2 (67)/1 (33)                                          |                | 3 (75)/1 (25)                       |                | 2 (50)/2 (50)                                    |                | 1 (25)/3 (75)                             |                |
| Extension of chronic inflammatory infiltrate into submucosa |                      |                                                        |                |                                     |                |                                                  |                |                                           |                |
| Not present                                                 | 46 (58)              | 16 (46)/19 (54)                                        | 0.73           | 36 (78)/10 (22)                     | 0.001          | 39 (87)/6 (13)                                   | < 0.001        | 24 (52)/22 (48)                           | < 0.01         |
| Present                                                     | 33 (42)              | 15 (48)/16 (52)                                        |                | 14 (42)/19 (58)                     |                | 8 (26)/22 (74)                                   |                | 7 (21)/26 (79)                            |                |
| Location of intraepithelial neutrophilic infiltration       |                      |                                                        |                |                                     |                |                                                  |                |                                           |                |
| Absent                                                      | 19 (22)              | 6 (46)/7 (54)                                          | 0.79           | 17 (90)/2 (10)                      | 0.03           | 17 (94)/1 (6)                                    | 0.03           | 16 (84)/3 (16)                            | < 0.001        |
| Present in crypt epithelium                                 | 8 (9)                | 2 (29)/5 (71)                                          |                | 5 (63)/3 (37)                       |                | 5 (63)/3 (37)                                    |                | 4 (50)/4 (50)                             |                |
| Present in superficial epithelium                           | 16 (18)              | 6 (43)/8 (57)                                          |                | 13 (81)/3 (19)                      |                | 11 (73)/4 (27)                                   |                | 9 (56)/7 (44)                             |                |
| Present in crypt and superficial epithelium                 | 47 (52)              | 20 (49)/21 (51)                                        |                | 26 (55)/21 (45)                     |                | 25 (56)/20 (44)                                  |                | 11 (23)/36 (77)                           |                |

| <b>Histopathological features</b>                  | <b>Total<br/>No. (%)</b> | <b>Grade of<br/>diarrhea<sup>†</sup><br/>G2/G3 No. (%)</b> | <b>P value</b> | <b>Bloody stools<br/>no/yes No. (%)</b> | <b>P value</b> | <b>Endoscopic Mayo<br/>score<br/>0-1/2-3 No. (%)</b> | <b>P value</b> | <b>Need for<br/>infliximab no/yes<br/>No. (%)</b> | <b>P value</b> |
|----------------------------------------------------|--------------------------|------------------------------------------------------------|----------------|-----------------------------------------|----------------|------------------------------------------------------|----------------|---------------------------------------------------|----------------|
| Grade of intraepithelial neutrophilic infiltration | 19 (21)                  | 6 (46)/7 (54)                                              | 0.59           | 17 (90)/2 (10)                          | < 0.01         | 17 (94)/1 (6)                                        | < 0.001        | 16 (84)/3 (16)                                    | < 0.001        |
| None                                               | 15 (17)                  | 6 (55)/5 (45)                                              |                | 12 (80)/3 (20)                          |                | 13 (93)/1 (7)                                        |                | 10 (67)/5 (33)                                    |                |
| Minimal                                            | 46 (51)                  | 17 (40)/26 (60)                                            |                | 29 (63)/17 (37)                         |                | 25 (57)/19 (43)                                      |                | 11 (24)/35 (76)                                   |                |
| Mild                                               | 10 (11)                  | 5 (63)/3 (37)                                              |                | 3 (30)/7 (70)                           |                | 3 (30)/7 (70)                                        |                | 3 (30)/7 (70)                                     |                |
| Moderate                                           | 0 (0)                    | 0 (0)                                                      |                | 0 (0)                                   |                | 0 (0)                                                |                | 0 (0)                                             |                |
| Severe                                             |                          |                                                            |                |                                         |                |                                                      |                |                                                   |                |
| Neutrophilic crypt abscesses                       |                          |                                                            |                |                                         |                |                                                      |                |                                                   |                |
| Absent                                             | 34 (38)                  | 12 (44)/15 (56)                                            | 0.64           | 26 (77)/8 (23)                          | 0.36           | 25 (76)/8 (24)                                       | 0.47           | 22 (65)/12 (35)                                   | 0.01           |
| Mild                                               | 46 (51)                  | 19 (50)/19 (50)                                            |                | 28 (61)/18 (39)                         |                | 28 (65)/15 (35)                                      |                | 16 (35)/30 (65)                                   |                |
| Moderate                                           | 8 (9)                    | 2 (25)/6 (75)                                              |                | 5 (63)/3 (37)                           |                | 4 (50)/4 (50)                                        |                | 2 (25)/6 (75)                                     |                |
| Severe                                             | 2 (2)                    | 1 (50)/1 (50)                                              |                | 2 (100)/0 (0)                           |                | 1 (50)/1 (50)                                        |                | 0 (0)/2 (100)                                     |                |
| Location of intraepithelial lymphocytosis          |                          |                                                            |                |                                         |                |                                                      |                |                                                   |                |
| Absent                                             | 66 (73)                  | 25 (42)/34 (58)                                            | 0.27           | 42 (64)/24 (36)                         | 0.55           | 39 (62)/24 (38)                                      | 0.32           | 27 (41)/39 (59)                                   | 0.70           |
| Present in crypt epithelium                        | 4 (5)                    | 3 (100)/0 (0)                                              |                | 3 (75)/1 (25)                           |                | 3 (75)/1 (25)                                        |                | 2 (50)/2 (50)                                     |                |
| Present in superficial epithelium                  | 8 (9)                    | 3 (43)/4 (57)                                              |                | 6 (75)/2 (25)                           |                | 7 (88)/1 (12)                                        |                | 4 (50)/4 (50)                                     |                |
| Present in crypt and superficial epithelium        | 12 (13)                  | 3 (50)/3 (50)                                              |                | 10 (83)/2 (17)                          |                | 9 (82)/2 (18)                                        |                | 7 (58)/5 (42)                                     |                |
| Grade of intraepithelial lymphocytosis             |                          |                                                            |                |                                         |                |                                                      |                |                                                   |                |
| Absent                                             | 66 (73)                  | 25 (42)/34 (58)                                            | 0.59           | 42 (64)/24 (36)                         | 0.59           | 39 (62)/24 (38)                                      | 0.43           | 27 (41)/39 (59)                                   | 0.38           |
| Minimal and patchy                                 | 15 (17)                  | 7 (58)/5 (42)                                              |                | 11 (73)/4 (27)                          |                | 11 (79)/3 (21)                                       |                | 7 (47)/8 (53)                                     |                |
| Mild                                               | 6 (7)                    | 2 (50)/2 (50)                                              |                | 5 (83)/1 (17)                           |                | 5 (83)/1 (17)                                        |                | 3 (50)/3 (50)                                     |                |
| Moderate                                           | 2 (2)                    | 0 (0)/0 (0)                                                |                | 2 (100)/0 (0)                           |                | 2 (100)/0 (0)                                        |                | 2 (100)/0 (0)                                     |                |
| Severe                                             | 1 (1)                    | 0 (0)/0 (0)                                                |                | 1 (100)/0 (0)                           |                | 1 (100)/0 (0)                                        |                | 1 (100)/0 (0)                                     |                |
| Mucin depletion of epithelial cells                |                          |                                                            |                |                                         |                |                                                      |                |                                                   |                |
| Not present                                        | 46 (51)                  | 15 (41)/22 (59)                                            | 0.37           | 37 (80)/9 (20)                          | < 0.001        | 38 (84)/7 (16)                                       | < 0.001        | 24 (52)/22 (48)                                   | 0.29           |
| Mild                                               | 32 (36)                  | 15 (56)/12 (44)                                            |                | 22 (69)/10 (31)                         |                | 19 (66)/10 (34)                                      |                | 13 (41)/19 (59)                                   |                |
| Moderate                                           | 10 (11)                  | 4 (44)/5 (56)                                              |                | 1 (10)/9 (90)                           |                | 1 (10)/9 (90)                                        |                | 3 (30)/7 (70)                                     |                |
| Severe                                             | 2 (2)                    | 0 (0)/2 (100)                                              |                | 1 (50)/1 (50)                           |                | 0 (0)/2 (100)                                        |                | 0 (0)/2 (100)                                     |                |
| Ulceration                                         |                          |                                                            |                |                                         |                |                                                      |                |                                                   |                |
| Absent                                             | 71 (79)                  | 27 (47)/30 (53)                                            | 0.53           | 48 (68)/23 (32)                         | 0.95           | 55 (78)/16 (22)                                      | < 0.001        | 35 (49)/36 (51)                                   | 0.07           |
| Present                                            | 19 (21)                  | 7 (39)/11 (61)                                             |                | 13 (68)/6 (32)                          |                | 3 (20)/12 (80)                                       |                | 5 (26)/14 (74)                                    |                |
| Granuloma                                          |                          |                                                            |                |                                         |                |                                                      |                |                                                   |                |
| Absent                                             | 85 (94)                  | 31 (44)/40 (56)                                            | 0.22           | 58 (68)/27 (32)                         | 0.33           | 57 (70)/25 (30)                                      | 0.06           | 38 (45)/47 (55)                                   | 0.39           |
| Present in lamina propria                          | 4 (5)                    | 3 (75)/1 (25)                                              |                | 3 (75)/1 (25)                           |                | 1 (25)/3 (75)                                        |                | 1 (25)/3 (75)                                     |                |
| Present in submucosa                               | 1 (1)                    | 0 (0)/0 (0)                                                |                | 0 (0)/1 (100)                           |                | 0 (0)                                                |                | 1 (100)/0 (0)                                     |                |

Cases with missing values not included in  $\chi^2$  test

†Grade of diarrhea only G2 versus G3

\*The Endoscopic Mayo score was available for 86 episodes (four episodes could not be classified according to the endoscopic Mayo score).

**Supplementary Table 4.** Association of different immunotherapies with histopathological and endoscopic features from 92 endoscopies

|                                                                             | Total No. (%) | Anti CTLA-4<br>No. (%) | Anti PD-1<br>No. (%) | Combined anti CTLA-4 + anti PD-<br>(L)1 No. (%) | Sequential anti<br>CTLA-4 + anti PD-1<br>No. (%) | P value |
|-----------------------------------------------------------------------------|---------------|------------------------|----------------------|-------------------------------------------------|--------------------------------------------------|---------|
| Lamina propria cellularity                                                  |               |                        |                      |                                                 |                                                  |         |
| Normal                                                                      | 15 (16)       | 4 (8)                  | 5 (25)               | 4 (33)                                          | 2 (24)                                           | 0.12    |
| Increased                                                                   |               |                        |                      |                                                 |                                                  |         |
| Focal                                                                       | 7 (8)         | 3 (6)                  | 4 (20)               | 0 (0)                                           | 0 (0)                                            |         |
| Patchy                                                                      | 24 (27)       | 11 (22)                | 4 (20)               | 5 (42)                                          | 4 (50)                                           |         |
| Diffuse, superficial                                                        | 4 (4)         | 3 (6)                  | 1 (5)                | 0 (0)                                           | 0 (0)                                            |         |
| Diffuse, transmucosal - mild                                                | 24 (27)       | 17 (34)                | 3 (15)               | 3 (25)                                          | 1 (13)                                           |         |
| Diffuse, transmucosal - moderate                                            | 16 (18)       | 12 (24)                | 3 (15)               | 0 (0)                                           | 1 (13)                                           |         |
| Diffuse, transmucosal – severe                                              | 0 (0)         | 0 (0)                  | 0 (0)                | 0 (0)                                           | 0 (0)                                            |         |
| Crypt architecture                                                          |               |                        |                      |                                                 |                                                  |         |
| Normal                                                                      | 58 (64)       | 29 (58)                | 15 (75)              | 9 (75)                                          | 5 (63)                                           | 0.24    |
| Irregular – mild                                                            | 23 (26)       | 18 (36)                | 1 (5)                | 2 (17)                                          | 2 (25)                                           |         |
| Irregular – moderate                                                        | 8 (9)         | 3 (6)                  | 3 (15)               | 1 (8)                                           | 1 (12)                                           |         |
| Irregular – severe                                                          | 1 (1)         | 0 (0)                  | 1 (5)                | 0 (0)                                           | 0 (0)                                            |         |
| Mucosal surface                                                             |               |                        |                      |                                                 |                                                  |         |
| Flat/normal                                                                 | 74 (82)       | 44 (88)                | 16 (80)              | 9 (75)                                          | 5 (63)                                           | 0.28    |
| Irregular                                                                   | 15 (17)       | 6 (12)                 | 3 (15)               | 3 (25)                                          | 3 (37)                                           |         |
| Villous                                                                     | 1 (1)         | 0 (0)                  | 1 (5)                | 0 (0)                                           | 0 (0)                                            |         |
| Apoptotic cells in crypt epithelium                                         |               |                        |                      |                                                 |                                                  |         |
| Absent/hardly any                                                           | 52 (58)       | 29 (58)                | 11 (55)              | 8 (67)                                          | 4 (50)                                           | 0.72    |
| Mild                                                                        | 28 (31)       | 14 (28)                | 8 (40)               | 2 (17)                                          | 4 (50)                                           |         |
| Moderate                                                                    | 6 (7)         | 5 (10)                 | 0 (0)                | 1 (8)                                           | 0 (0)                                            |         |
| Severe                                                                      | 4 (4)         | 2 (4)                  | 1 (5)                | 1 (8)                                           | 0 (0)                                            |         |
| Extension of chronic inflammatory infiltrate into<br>submucosa <sup>1</sup> | 46 (58)       | 25 (53)                | 13 (81)              | 6 (60)                                          | 2 (33)                                           | 0.15    |
| Not present                                                                 | 33 (42)       | 22 (47)                | 3 (19)               | 4 (40)                                          | 4 (67)                                           |         |
| Present                                                                     |               |                        |                      |                                                 |                                                  |         |
| Location of intraepithelial neutrophilic infiltration                       |               |                        |                      |                                                 |                                                  |         |
| Absent                                                                      | 19 (21)       | 7 (14)                 | 6 (30)               | 4 (34)                                          | 2 (25)                                           | 0.68    |
| Present in crypt epithelium                                                 | 8 (9)         | 5 (10)                 | 2 (10)               | 1 (8)                                           | 0 (0)                                            |         |
| Present in superficial epithelium                                           | 16 (18)       | 9 (18)                 | 5 (25)               | 1 (8)                                           | 1 (13)                                           |         |
| Present in crypt and superficial epithelium                                 | 47 (52)       | 29 (58)                | 7 (35)               | 6 (50)                                          | 5 (62)                                           |         |

|                                                    | Total No. (%) | Anti CTLA-4<br>No. (%) | Anti PD-1<br>No. (%) | Combined anti CTLA-4 + anti PD-<br>(L)1 No. (%) | Sequential anti<br>CTLA-4 + anti PD-1<br>No. (%) | P value |
|----------------------------------------------------|---------------|------------------------|----------------------|-------------------------------------------------|--------------------------------------------------|---------|
| Grade of intraepithelial neutrophilic infiltration |               |                        |                      |                                                 |                                                  |         |
| None                                               | 19 (21)       | 7 (14)                 | 6 (30)               | 4 (33)                                          | 2 (25)                                           | 0.63    |
| Minimal                                            | 15 (17)       | 9 (18)                 | 4 (20)               | 2 (17)                                          | 0 (0)                                            |         |
| Mild                                               | 46 (51)       | 29 (58)                | 8 (40)               | 5 (42)                                          | 4 (50)                                           |         |
| Moderate                                           | 10 (11)       | 5 (10)                 | 2 (10)               | 1 (8)                                           | 2 (25)                                           |         |
| Severe                                             | 0 (0)         | 0 (0)                  | 0 (0)                | 0 (0)                                           | 0 (0)                                            |         |
| Neutrophilic crypt abscesses                       |               |                        |                      |                                                 |                                                  |         |
| Absent                                             | 34 (38)       | 16 (32)                | 11 (55)              | 3 (25)                                          | 4 (50)                                           | 0.49    |
| Mild                                               | 46 (51)       | 27 (54)                | 7 (35)               | 9 (75)                                          | 3 (38)                                           |         |
| Moderate                                           | 8 (9)         | 5 (10)                 | 2 (10)               | 0 (0)                                           | 1 (12)                                           |         |
| Severe                                             | 2 (2)         | 2 (4)                  | 0 (0)                | 0 (0)                                           | 0 (0)                                            |         |
| Location of intraepithelial lymphocytosis          |               |                        |                      |                                                 |                                                  |         |
| Absent                                             | 66 (74)       | 37 (74)                | 11 (55)              | 10 (84)                                         | 8 (100)                                          | 0.08    |
| Present in crypt epithelium                        | 4 (4)         | 3 (6)                  | 0 (0)                | 1 (8)                                           | 0 (0)                                            |         |
| Present in superficial epithelium                  | 8 (9)         | 2 (4)                  | 5 (25)               | 1 (8)                                           | 0 (0)                                            |         |
| Present in crypt and superficial epithelium        | 12 (13)       | 8 (16)                 | 4 (20)               | 0 (0)                                           | 0 (0)                                            |         |
| Grade of intraepithelial lymphocytosis             |               |                        |                      |                                                 |                                                  |         |
| Absent                                             | 66 (73)       | 37 (74)                | 11 (55)              | 10 (84)                                         | 8 (100)                                          | 0.16    |
| Minimal and patchy                                 | 15 (17)       | 10 (20)                | 4 (20)               | 1 (8)                                           | 0 (0)                                            |         |
| Mild                                               | 6 (7)         | 1 (2)                  | 4 (20)               | 1 (8)                                           | 0 (0)                                            |         |
| Moderate                                           | 2 (2)         | 2 (4)                  | 0 (0)                | 0 (0)                                           | 0 (0)                                            |         |
| Severe                                             | 1 (1)         | 0 (0)                  | 1 (5)                | 0 (0)                                           | 0 (0)                                            |         |
| Mucin depletion of epithelial cells                |               |                        |                      |                                                 |                                                  |         |
| Not present                                        | 46 (51)       | 22 (44)                | 14 (70)              | 6 (50)                                          | 4 (50)                                           | 0.65    |
| Mild                                               | 32 (36)       | 22 (44)                | 3 (15)               | 4 (33)                                          | 3 (38)                                           |         |
| Moderate                                           | 10 (11)       | 5 (10)                 | 2 (10)               | 2 (17)                                          | 1 (12)                                           |         |
| Severe                                             | 2 (2)         | 1 (2)                  | 1 (5)                | 0 (0)                                           | 0 (0)                                            |         |
| Ulceration                                         |               |                        |                      |                                                 |                                                  |         |
| Absent                                             | 71 (79)       | 40 (80)                | 17 (85)              | 9 (75)                                          | 5 (63)                                           | 0.60    |
| Present                                            | 19 (21)       | 10 (20)                | 3 (15)               | 3 (25)                                          | 3 (37)                                           |         |
| Granuloma                                          |               |                        |                      |                                                 |                                                  |         |
| Absent                                             | 85 (94)       | 47 (94)                | 20 (100)             | 10 (84)                                         | 8 (100)                                          | 0.19    |
| Present in lamina propria                          | 4 (5)         | 3 (6)                  | 0 (0)                | 1 (8)                                           | 0 (0)                                            |         |
| Present in submucosa                               | 1 (1)         | 0 (0)                  | 0 (0)                | 1 (8)                                           | 0 (0)                                            |         |



|                                  | <b>Total No. (%)</b> | <b>Anti CTLA-4<br/>No. (%)</b> | <b>Anti PD-1<br/>No. (%)</b> | <b>Combined anti CTLA-4 + anti PD-<br/>1 No. (%)</b> | <b>Sequential anti<br/>CTLA-4 + anti PD-1<br/>No. (%)</b> | <b>P value</b> |
|----------------------------------|----------------------|--------------------------------|------------------------------|------------------------------------------------------|-----------------------------------------------------------|----------------|
| <b>Endoscopic Mayo*</b>          |                      |                                |                              |                                                      |                                                           |                |
| 0-1 (low)                        | 60 (68)              | 34 (57)                        | 16 (84)                      | 7 (64)                                               | 3 (43)                                                    | 0.21           |
| 2-3 (high)                       | 28 (32)              | 17 (33)                        | 3 (16)                       | 4 (36)                                               | 4 (57)                                                    |                |
| <b>Total van der Heide score</b> |                      |                                |                              |                                                      |                                                           |                |
| 0-6 (low)                        | 50 (54)              | 25 (48)                        | 16 (80)                      | 6 (50)                                               | 3 (37)                                                    | 0.07           |
| 7-12 (high)                      | 42 (46)              | 27 (52)                        | 4 (20)                       | 6 (50)                                               | 5 (63)                                                    |                |

Cases with missing values not included in  $\chi^2$  test

\*The Endoscopic Mayo score was available for 88 episodes (four episodes could not be classified according to the endoscopic Mayo score).
